# Supplementary material for: MicroNeurotrophins Improve Survival in Motor Neuron-Astrocyte Co-Cultures but Do Not Improve Disease Phenotypes in a Mutant SOD1 Mouse Model of Amyotrophic Lateral Sclerosis
Source: PubMed Central journal article supplement (PMC5055348; doi:10.1371/journal.pone.0164103), 2016-10-07

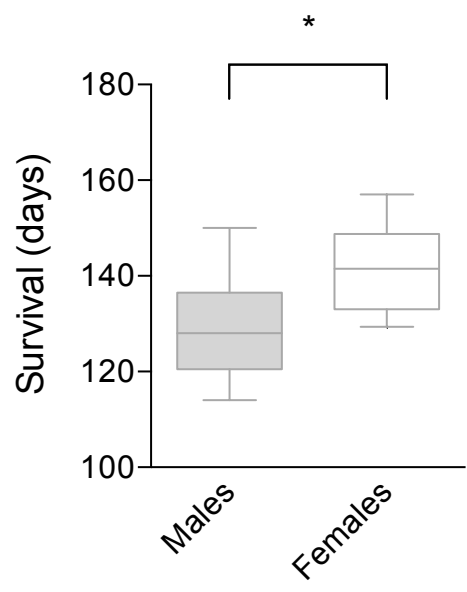

Supplement: pone.0164103.s001.pdf [file pone.0164103.s001.pdf]
